# Supplementary material for: The prevalence and development of anemia in community- acquired pneumonia patients and its association with the duration of hospitalization and mortality
Source: Research Square preprint supplement (doi:10.21203/rs.3.rs-7957203/v1), 2025-12-30
Supplement: Supplementary file 1 [file 0e5d36ac839e296d1956b27c.pdf]

**The prevalence and development of anemia in community-acquired pneumonia patients and its association with the duration of hospitalization and mortality: questionnaire.**

|                                                                                                                                                                                                                                         |                                                                                                                                                                                                                                                           |                    |
|-----------------------------------------------------------------------------------------------------------------------------------------------------------------------------------------------------------------------------------------|-----------------------------------------------------------------------------------------------------------------------------------------------------------------------------------------------------------------------------------------------------------|--------------------|
| <b>Patient Name</b>                                                                                                                                                                                                                     | <b>Patient sex</b>                                                                                                                                                                                                                                        | <b>Patient age</b> |
| <b>Smoking</b><br>Smoking type: <ul style="list-style-type: none"> <li>- Cigarettes</li> <li>- Hookah</li> </ul><br>Smoking duration: .....packet/year                                                                                  | <b>Comorbidities:</b><br>Diabetes Meletus's<br>Pulmonary Diseases <ul style="list-style-type: none"> <li>- Asthma</li> <li>- COPD</li> <li>- Lung Fibrosis</li> </ul> Hypertension \ Chronic Heart Failure<br>Liver Diseases<br>Kidney Diseases<br>Tumors |                    |
| <b>Antibiotic Use Prior to Admission</b>                                                                                                                                                                                                | <b>Symptoms</b><br>Cough<br>Dyspnea<br>Fever<br>Chest Pain<br>Hemoptysis                                                                                                                                                                                  |                    |
| <b>Pneumonia Severity Index (PSI)</b> <ul style="list-style-type: none"> <li>- Points less than 70 (I)</li> <li>- Points 70 to 90 (II)</li> <li>- Points more than 91 (III – IV)</li> </ul>                                             |                                                                                                                                                                                                                                                           |                    |
| <b>Hemoglobin values</b> <ul style="list-style-type: none"> <li>- Day one</li> <li>- Day four</li> <li>- Day seven</li> <li>- Discharge day</li> </ul>                                                                                  | <b>Anemia severity</b> <ul style="list-style-type: none"> <li>- No Anemia</li> <li>- Mild Anemia</li> <li>- Moderate Anemia</li> <li>- Severe Anemia</li> <li>- Life Threatening Anemia</li> </ul>                                                        |                    |
| <b>In Hospital Complications</b> <ul style="list-style-type: none"> <li>- Treatment Failure</li> <li>- Death</li> <li>- ICU Admission</li> <li>- Septic Shock</li> <li>- Blood Transfusion</li> <li>- Mechanical Ventilation</li> </ul> | <b>Length of Hospital Stay (LOHS)</b>                                                                                                                                                                                                                     |                    |
